# Supplementary material
Source: MDPI journal article supplement (https://www.mdpi.com/2071-1050/14/8/4728)
Supplement: s1 [file s1 › sustainability-1676782-supplementary.pdf]

**Supplementary data.** EU 27 tables of NECPs and LTS scores. Supplementary data contains the results of the semantic scaling methodology for Member States arranged in alphabetical order. The set of tables ensure the transparency and reproducibility of the methods and results.

### Austria

**Table S1.** Austria LTS Scores.

| Austria – LTS                       | Value              | Score |
|-------------------------------------|--------------------|-------|
| Overall goal of LTS                 | climate neutrality | 1     |
| Scenarios presented in the LTS      | 1 scenario         | 1     |
| GHG reductions                      | modelling          | 1     |
| Renewable energy sources            | modelling          | 1     |
| Energy Efficiency                   | modelling          | 1     |
| Estimated Investment                | N/A                | 0     |
| Socio-Economic impact of transition | N/A                | 0     |
| Adaptation Policies measures        | yes                | 1     |
| Public Consultation                 | yes                | 1     |
| Legal status of LTS and targets     | no                 | 0     |
| Total                               |                    | 7     |

**Table S2.** Austria NECPs Targets.

| Austria – NECPs Targets         |                                  |             |             |                  |        |                       |
|---------------------------------|----------------------------------|-------------|-------------|------------------|--------|-----------------------|
| National Target Contribution    | Latest Available Data (Oct 2020) | 2020 Target | 2030 Target | Ambition Level   | Scores | EU NECPs 2030 Targets |
| GHG                             | -11                              | -16         | -36         | As in ESR (adeq) | 5      | 40                    |
| Renewables energy               | 33.4                             | 34          | 46          | adequate         | 5      | 32                    |
| Energy Efficiency primary       | 30                               | 31.5        | 29          | low              | 2      | 32.5                  |
| Energy Efficiency final         | 25.6                             | 25.1        | 25          | low              | 2      |                       |
| Electric grid interconnectivity | 15.3                             | 10          | 15          |                  |        |                       |
| Total score                     |                                  |             |             |                  | 14     |                       |

**Table S3.** Austria NECPs Recommendations.

| Austria – NECPs Recommendations |                                 |                       |       |
|---------------------------------|---------------------------------|-----------------------|-------|
| Recommendations                 | N of Recommendations per Policy | Quality of Assessment | Score |
| 1 Decarbonization—GHG           | 2                               | partially             | 0.250 |
|                                 |                                 | NA                    | 0.000 |
| 2 Decarbonization renew         | 5                               | fully                 | 0.200 |
|                                 |                                 | fully                 | 0.200 |
|                                 |                                 | partially             | 0.100 |
|                                 |                                 | partially             | 0.100 |
|                                 |                                 | fully                 | 0.200 |
| 3 Energy efficiency             | 3                               | partially             | 0.167 |
|                                 |                                 | NA                    | 0.000 |
|                                 |                                 | partially             | 0.167 |
| 4 Energy security               | 1                               | NA                    | 0.000 |
| 5 Internal energy market        | 1                               | NA                    | 1.000 |
| 6 Research and Innovation       | 2                               | largely               | 0.375 |

|    |                                    |   |           |       |
|----|------------------------------------|---|-----------|-------|
| 7  | Regional cooperation               | 3 | partially | 0.250 |
|    |                                    |   | partially | 0.167 |
|    |                                    |   | partially | 0.167 |
| 8  | Investment and funding             | 2 | partially | 0.167 |
|    |                                    |   | largely   | 0.375 |
| 9  | Energy subsidies                   | 3 | partially | 0.250 |
|    |                                    |   | partially | 0.167 |
|    |                                    |   | NA        | 0.000 |
| 10 | Air quality                        | 1 | partially | 0.167 |
| 11 | Just transition and energy poverty | 2 | partially | 0.500 |
|    |                                    |   | NA        | 0.000 |
|    |                                    |   | largely   | 0.375 |
|    |                                    |   |           | 5.342 |

## Belgium

Table S4. Belgium NECPs Targets

| Belgium—NECPs Targets           |                                  |             |             |                  |   |                      |
|---------------------------------|----------------------------------|-------------|-------------|------------------|---|----------------------|
| National Target Contribution    | Latest Available Data (Oct 2020) | 2020 Target | 2030 Target | Ambition Level   |   | EU NECPs 2030 Target |
| GHG                             | −11                              | −16         | −36         | As in ESR (adeq) | 5 | 40                   |
| Renewables energy               | 33.4                             | 34          | 46          | adequate         | 5 | 32                   |
| Energy Efficiency primary       | 30                               | 31.5        | 29          | low              | 2 | 32.5                 |
| Energy Efficiency final         | 25.6                             | 25.1        | 25          | low              | 2 |                      |
| Electric grid interconnectivity | 15.3                             | 10          | 15          |                  |   |                      |
|                                 |                                  |             |             | 14               |   |                      |

Table S5. Belgium LTS Scores

| Belgium—LTS                         | Value        | Score |
|-------------------------------------|--------------|-------|
| Overall goal of LTS                 | unclear goal | 0.5   |
| Scenarios presented in the LTS      | 0 scenario   | 0     |
| GHG reductions                      | modelling    | 1     |
| Renewable energy sources            | N/A          | 0     |
| Energy Efficiency                   | N/A          | 0     |
| Estimated Investment                | N/A          | 0     |
| Socio-Economic impact of transition | N/A          | 0     |
| Adaptation Policies measures        | yes          | 1     |
| Public Consultation                 | limited      | 0.5   |
| Legal status of LTS and targets     | no           | 0     |
|                                     |              | 3     |

**Table S6. Belgium NECPs Recommendations**

| <b>Belgium – Recommendations</b>   |                                        |                              |              |
|------------------------------------|----------------------------------------|------------------------------|--------------|
| <b>Recommendations</b>             | <b>N of Recommendations per Policy</b> | <b>Quality of Assessment</b> | <b>Score</b> |
| Decarbonization – GHG              | 2                                      | part                         | 0.250        |
|                                    |                                        | partially                    | 0.250        |
|                                    | 6                                      | NA                           | 0.000        |
|                                    |                                        | NA                           | 0.000        |
| Decarbonization Renew              |                                        | partially                    | 0.083        |
|                                    |                                        | NA                           | 0.000        |
|                                    |                                        | partially                    | 0.083        |
|                                    |                                        | partially                    | 0.083        |
| Energy efficiency                  | 2                                      | NA                           | 0.000        |
|                                    |                                        | partially                    | 0.250        |
| Energy security                    | 2                                      | largely                      | 0.375        |
|                                    |                                        | Fully                        | 0.500        |
| Internal energy market             | 1                                      | No Rec                       | 1.000        |
| Research and Innovation            | 2                                      | partially                    | 0.250        |
|                                    |                                        | largely                      | 0.375        |
| Regional cooperation               | 1                                      | fully                        | 1.000        |
| Investment and funding             | 2                                      | partially                    | 0.250        |
|                                    |                                        | largely                      | 0.375        |
| Energy subsidies                   | 3                                      | NA                           | 0.000        |
|                                    |                                        | NA                           | 0.000        |
|                                    |                                        | partially                    | 0.167        |
| Air quality                        | 1                                      | partially                    | 0.500        |
| Just transition and energy poverty | 2                                      | largely                      | 0.375        |
|                                    |                                        | largely                      | 0.375        |
|                                    |                                        |                              | 6.542        |

## **Bulgaria**

**Table S7. Bulgaria NECPs Targets**

| <b>Bulgaria – NECPs Target</b>      |                                         |                    |                    |                       |                             |      |
|-------------------------------------|-----------------------------------------|--------------------|--------------------|-----------------------|-----------------------------|------|
| <b>National Target Contribution</b> | <b>Latest Available Data (Oct 2020)</b> | <b>2020 Target</b> | <b>2030 Target</b> | <b>Ambition Level</b> | <b>EU NECPs 2030 Target</b> |      |
| GHG                                 | 21                                      | 20                 | 0                  | As in ESR (adeq)      | 5                           | –40  |
| Renewables energy                   | 20.5                                    | 21.4               | 27.09              | adequate              | 5                           | 32   |
| Energy Efficiency primary           | 18.34                                   | 16.9               | 17.5               | low                   | 2                           | 32.5 |
| Energy Efficiency final             | 9.9                                     | 8.67               | 10.3               | very low              | 1                           |      |
| Electric grid interconnectivity     | 7.1                                     | 11.3               | 15                 |                       |                             |      |
|                                     |                                         |                    |                    |                       | 13                          |      |

**Table S8. Bulgaria NECPs Recommendations**

| <b>Bulgaria – NECPs Recommendations</b> |                                        |                              |              |
|-----------------------------------------|----------------------------------------|------------------------------|--------------|
| <b>Recommendations</b>                  | <b>N of Recommendations per Policy</b> | <b>Quality of Assessment</b> | <b>Score</b> |
| Decarbonization – GHG                   | 1                                      | No rec                       | 1.000        |
| Decarbonization renew                   | 6                                      | fully                        | 0.167        |
|                                         |                                        | fully                        | 0.167        |
|                                         |                                        | partially                    | 0.083        |
|                                         |                                        | partially                    | 0.083        |
|                                         |                                        | largely                      | 0.125        |
|                                         |                                        | NA                           | 0.000        |
| Energy efficiency                       | 4                                      | NA                           | 0.000        |
|                                         |                                        | partially                    | 0.125        |
|                                         |                                        | partially                    | 0.125        |
|                                         |                                        | partially                    | 0.125        |
| Energy security                         | 1                                      | largely                      | 0.750        |
| Internal energy market                  | 1                                      | partially                    | 0.500        |
| Research and Innovation                 | 2                                      | NA                           | 0.000        |
|                                         |                                        | partially                    | 0.250        |
| Regional cooperation                    | 1                                      | largely                      | 0.750        |
| Investment and funding                  | 3                                      | partially                    | 0.167        |
|                                         |                                        | partially                    | 0.167        |
|                                         |                                        | NA                           | 0.000        |
| Energy subsidies                        | 3                                      | partially                    | 0.167        |
|                                         |                                        | NA                           | 0.000        |
|                                         |                                        | partially                    | 0.167        |
| Air quality                             | 4                                      | fully                        | 0.250        |
|                                         |                                        | partially                    | 0.125        |
|                                         |                                        | largely                      | 0.188        |
|                                         |                                        | NA                           | 0.000        |
| Just transition and energy poverty      | 3                                      | partially                    | 0.167        |
|                                         |                                        | partially                    | 0.167        |
|                                         |                                        | partially                    | 0.167        |
|                                         |                                        |                              | 5.979        |

**Table S9. Bulgaria LTS Scores**

| <b>Bulgaria – LTS</b>               | <b>Value</b> | <b>Score</b> |
|-------------------------------------|--------------|--------------|
| Overall goal of LTS                 |              | 0            |
| Scenarios presented in the LTS      |              | 0            |
| GHG reductions                      |              | 0            |
| Renewable energy sources            |              | 0            |
| Energy Efficiency                   |              | 0            |
| Estimated Investment                |              | 0            |
| Socio-Economic impact of transition |              | 0            |
| Adaptation Policies measures        |              | 0            |
| Public Consultation                 |              | 0            |
| Legal status of LTS and targets     |              | 0            |

## Croatia

Table S10. Croatia NECPs Targets

| Croatia – NECPs Targets         |                                  |             |             |                    |    |                      |
|---------------------------------|----------------------------------|-------------|-------------|--------------------|----|----------------------|
| National Target Contribution    | Latest available data (Oct 2020) | 2020 Target | 2030 Target | Ambition Level     |    | EU NECPs 2030 Target |
| GHG                             | –1                               | 11          | –7          | As in ESR (adeq)   | 5  | –40                  |
| Renewables energy               | 28                               | 20          | 36.4        | Sufficiently ambit | 6  | 32                   |
| Energy Efficiency primary       | 8.2                              | 10.7        | 8.23        | low                | 2  | 32.5                 |
| Energy Efficiency final         | 6.9                              | 7           | 6.85        | low                | 2  |                      |
| Electric grid interconnectivity | 7.1                              | 11.3        | 15          |                    |    |                      |
|                                 |                                  |             |             |                    | 15 |                      |

Table S11. Croatia NECPs Recommendations

| Croatia – NECPs Recommendations    |                                 |                       |       |
|------------------------------------|---------------------------------|-----------------------|-------|
| Recommendations                    | N of Recommendations per Policy | Quality of Assessment | Score |
| Decarbonization – GHG              | 1                               | No rec                | 1.000 |
| Decarbonization renew              | 3                               | NA                    | 0.000 |
|                                    |                                 | NA                    | 0.000 |
|                                    |                                 | partially             | 0.167 |
| Energy efficiency                  | 2                               | NA                    | 0.000 |
|                                    |                                 | partially             | 0.250 |
| Energy security                    | 1                               | NA                    | 1.000 |
| Internal energy market             | 1                               | Partially             | 0.500 |
| Research and Innovation            | 1                               | partially             | 0.500 |
| Regional cooperation               | 2                               | largely               | 0.375 |
|                                    |                                 | largely               | 0.375 |
| Investment and funding             | 2                               | partially             | 0.250 |
|                                    |                                 | partially             | 0.250 |
| Energy subsidies                   | 3                               | largely               | 0.375 |
|                                    |                                 | partially             | 0.250 |
|                                    |                                 | NA                    | 0.000 |
| Air quality                        | 1                               | partially             | 0.500 |
| Just transition and energy poverty | 2                               | partially             | 0.250 |
|                                    |                                 | partially             | 0.250 |
|                                    |                                 |                       | 6.292 |

Table S12. Croatia LTS Scores

| Croatia – LTS                  | Value        | Score |
|--------------------------------|--------------|-------|
| Overall goal of LTS            | unclear goal | 0.5   |
| Scenarios presented in the LTS | 3 scenarios  | 1     |
| GHG reductions                 | modelling    | 1     |
| Renewable energy sources       | modelling    | 1     |
| Energy Efficiency              | modelling    | 1     |

|                                     |            |     |
|-------------------------------------|------------|-----|
| Estimated Investment                | estimation | 1   |
| Socio-Economic impact of transition | N/A        | 0   |
| Adaptation Policies measures        | yes        | 1   |
| Public Consultation                 | yes        | 1   |
| Legal status of LTS and targets     | yes        | 1   |
|                                     |            | 8.5 |

## Cyprus

Table S13. Cyprus NECPs Targets

| Cyprus – NECPs Targets          |                                  |             |             |                  |    |                      |
|---------------------------------|----------------------------------|-------------|-------------|------------------|----|----------------------|
| National Target Contribution    | Latest Available Data (Oct 2020) | 2020 Target | 2030 Target | Ambition Level   |    | EU NECPs 2030 Target |
| GHG                             | 0                                | –5          | –24         | As in ESR (adeq) | 5  | –40                  |
| Renewables energy               | 13.9                             | 13          | 22.9        | adequate         | 5  | 32                   |
| Energy Efficiency primary       | 2.55                             | 2.5         | 2.4         | low              | 2  | 32.5                 |
| Energy Efficiency final         | 1.86                             | 1.9         | 2           | Very Low         | 1  |                      |
| Electric grid interconnectivity | not interc                       | not interc  | 200%        |                  |    |                      |
|                                 |                                  |             |             |                  | 13 |                      |

Table S14. Cyprus NECPs Recommendations

| Cyprus – NECPs Recommendations     |                                 |                       |       |
|------------------------------------|---------------------------------|-----------------------|-------|
| Recommendations                    | N of Recommendations per Policy | Quality of Assessment | Score |
| Decarbonization – GHG              | 3                               | largely               | 0.250 |
|                                    |                                 | largely               | 0.250 |
|                                    |                                 | largely               | 0.250 |
| Decarbonization renew              | 6                               | partially             | 0.083 |
|                                    |                                 | partially             | 0.083 |
|                                    |                                 | partially             | 0.083 |
|                                    |                                 | largely               | 0.125 |
|                                    |                                 | partially             | 0.083 |
|                                    |                                 | largely               | 0.125 |
| Energy efficiency                  | 3                               | partially             | 0.167 |
|                                    |                                 | largely               | 0.250 |
|                                    |                                 | partially             | 0.167 |
| Energy security                    | 1                               | largely               | 0.750 |
| Internal energy market             | 1                               | largely               | 0.750 |
| Research and Innovation            | 2                               | partially             | 0.250 |
|                                    |                                 | partially             | 0.250 |
| Regional cooperation               | 2                               | partially             | 0.250 |
|                                    |                                 | NA                    | 0.000 |
| Investment and funding             | 2                               | fully                 | 0.500 |
|                                    |                                 | partially             | 0.250 |
| Energy subsidies                   | 3                               | partially             | 0.167 |
|                                    |                                 | NA                    | 0.000 |
|                                    |                                 | partially             | 0.167 |
| Air quality                        | 1                               | largely               | 0.750 |
| Just transition and energy poverty | 2                               | largely               | 0.375 |

|  |         |       |
|--|---------|-------|
|  | largely | 0.375 |
|  |         | 6.750 |

**Table S15.** Cyprus LTS Scores

| <b>Cyprus – LTS</b>                 | <b>Value</b> | <b>Score</b> |
|-------------------------------------|--------------|--------------|
| Overall goal of LTS                 |              | 0            |
| Scenarios presented in the LTS      |              | 0            |
| GHG reductions                      |              | 0            |
| Renewable energy sources            |              | 0            |
| Energy Efficiency                   |              | 0            |
| Estimated Investment                |              | 0            |
| Socio-Economic impact of transition |              | 0            |
| Adaptation Policies measures        |              | 0            |
| Public Consultation                 |              | 0            |
| Legal status of LTS and targets     |              | 0            |
|                                     |              | 0            |

### **Czech Republic**

**Table S16.** Czech Republic NECPs Targets

| <b>Czech Republic – NECPs Target</b> |                                  |             |             |                  |                      |      |
|--------------------------------------|----------------------------------|-------------|-------------|------------------|----------------------|------|
| National Target Contribution         | Latest Available Data (oct 2020) | 2020 Target | 2030 Target | Ambition Level   | EU NECPs 2030 Target |      |
| GHG                                  | –4                               | –9          | –14         | As in ESR (adeq) | 5                    | –40  |
| Renewables energy                    | 15                               | 13          | 22          | unambitious      | 4                    | 32   |
| Energy Efficiency primary            | 40.4                             | 43.341.43   | 2.4         | low              | 2                    | 32.5 |
| Energy Efficiency final              | 25.3                             | 23.9        | 23.65       | modest           | 3                    |      |
| Electric grid interconnectivity      | 26.6                             | 29.6        | 44%         |                  |                      |      |

**Table S17.** Czech Republic NECPs Recommendations

| <b>Czech Republic – NECPs Recommendations</b> |                                 |                       |       |
|-----------------------------------------------|---------------------------------|-----------------------|-------|
| Recommendations                               | N of Recommendations per Policy | Quality of Assessment | Score |
| Decarbonization – GHG                         | 1                               | No rec                | 1.000 |
| Decarbonization renew                         | 5                               | partially             | 0.100 |
|                                               |                                 | partially             | 0.100 |
|                                               |                                 | partially             | 0.100 |
|                                               |                                 | largely               | 0.150 |
|                                               |                                 | partially             | 0.100 |
| Energy efficiency                             | 2                               | NA                    | 0.000 |
|                                               |                                 | partially             | 0.250 |
| Energy security                               | 3                               | partially             | 0.167 |
|                                               |                                 | partially             | 0.167 |

|                                    |   |           |       |
|------------------------------------|---|-----------|-------|
|                                    |   | partially | 0.167 |
| Internal energy market             | 2 | largely   | 0.375 |
|                                    |   | largely   | 0.375 |
| Research and Innovation            | 2 | partially | 0.250 |
|                                    |   | partially | 0.250 |
| Regional cooperation               | 1 | partially | 0.500 |
| Investment and funding             | 2 | partially | 0.250 |
|                                    |   | fully     | 0.500 |
| Energy subsidies                   | 3 | largely   | 0.250 |
|                                    |   | largely   | 0.250 |
|                                    |   | NA        | 0.000 |
| Air quality                        | 1 | largely   | 0.750 |
| Just transition and energy poverty | 2 | partially | 0.250 |
|                                    |   | partially | 0.250 |
|                                    |   |           | 6.550 |

**Table S18.** Czech Republic LTS Scores

| <b>Czech Republic – LTS</b>         | <b>Value</b> | <b>Score</b> |
|-------------------------------------|--------------|--------------|
| Overall goal of LTS                 | unclear goal | 0.5          |
| Scenarios presented in the LTS      | 7 scenarios  | 1            |
| GHG reductions                      | modelling    | 1            |
| Renewable energy sources            | N/A          | 0            |
| Energy Efficiency                   | N/A          | 0            |
| Estimated Investment                | estimation   | 1            |
| Socio-Economic impact of transition | N/A          | 0            |
| Adaptation Policies measures        | yes          | 1            |
| Public Consultation                 | limited      | 0.5          |
| Legal status of LTS and targets     | no           | 0            |
|                                     |              | <b>5</b>     |

## Denmark

**Table S19.** Denmark NECPs Targets

| <b>Denmark – NECPs Target</b>       |                                         |                    |                    |                       |                             |      |
|-------------------------------------|-----------------------------------------|--------------------|--------------------|-----------------------|-----------------------------|------|
| <b>National Target Contribution</b> | <b>Latest Available Data (oct 2020)</b> | <b>2020 Target</b> | <b>2030 Target</b> | <b>Ambition Level</b> | <b>EU NECPs 2030 Target</b> |      |
| GHG                                 | –19                                     | –20                | –39                | As in ESR (adeq)      | 5                           | –40  |
| Renewables energy                   | 35.7                                    | 30                 | 55                 | suff amb              | 6                           | 32   |
| Energy Efficiency primary           | 17.8                                    | 17.5               | 18.3               | very low              | 1                           | 32.5 |
| Energy Efficiency final             | 14.8                                    | 15.2               | 15.8               | very low              | 1                           |      |
| Electric grid interconnectivity     | 51                                      | N/A                | N/A                |                       |                             |      |
|                                     |                                         |                    |                    |                       |                             | 13   |

**Table S20.** Denmark NECPs Recommendations

| <b>Denmark – NECPs Recommendations</b> |                                        |                              |              |
|----------------------------------------|----------------------------------------|------------------------------|--------------|
| <b>Recommendations</b>                 | <b>N of Recommendations per Policy</b> | <b>Quality of Assessment</b> | <b>Score</b> |

|                                    |   |           |       |
|------------------------------------|---|-----------|-------|
| Decarbonization – GHG              | 3 | NA        | 0.000 |
|                                    |   | NA        | 0.000 |
|                                    |   | NA        | 0.000 |
| Decarbonization renew              | 4 | partially | 0.125 |
|                                    |   | partially | 0.125 |
|                                    |   | partially | 0.125 |
|                                    |   | partially | 0.125 |
| Energy efficiency                  | 3 | NA        | 0.000 |
|                                    |   | partially | 0.167 |
|                                    |   | partially | 0.167 |
| Energy security                    | 1 | Not rec   | 1.000 |
| Internal energy market             | 1 | partially | 0.500 |
| Research and Innovation            | 1 | partially | 0.500 |
| Regional cooperation               | 3 | largely   | 0.250 |
|                                    |   | largely   | 0.250 |
|                                    |   | partially | 0.167 |
| Investment and funding             | 1 | Fully     | 1.000 |
| Energy subsidies                   | 3 | largely   | 0.250 |
|                                    |   | largely   | 0.250 |
|                                    |   | largely   | 0.250 |
| Air quality                        | 1 | partially | 0.500 |
| Just transition and energy poverty | 1 | partially | 0.500 |
|                                    |   |           | 6.250 |

**Table S21.** Denmark LTS Scores

| Denmark LTS                         | Value        | Score |
|-------------------------------------|--------------|-------|
| Overall goal of LTS                 | unclear goal | 0.5   |
| Scenarios presented in the LTS      | 7 scenarios  | 1     |
| GHG reductions                      | modelling    | 1     |
| Renewable energy sources            | N/A          | 0     |
| Energy Efficiency                   | N/A          | 0     |
| Estimated Investment                | estimation   | 1     |
| Socio-Economic impact of transition | N/A          | 0     |
| Adaptation Policies measures        | yes          | 1     |
| Public Consultation                 | limited      | 0.5   |
| Legal status of LTS and targets     | no           | 0     |
|                                     |              | 5     |

#### Estonia

**Table S22.** Estonia NECPs Targets

| Estonia – NECPs Target          |                                  |             |             |                  |                      |      |
|---------------------------------|----------------------------------|-------------|-------------|------------------|----------------------|------|
| National Target Contribution    | Latest Available Data (oct 2020) | 2020 Target | 2030 Target | Ambition Level   | EU NECPs 2030 Target |      |
| GHG                             | 17                               | 11          | –13         | As in ESR (adeq) | 5                    | –40  |
| Renewables energy               | 30                               | 30          | 55          | suff amb         | 6                    | 32   |
| Energy Efficiency primary       | 17.8                             | 17.5        | 18.3        | very low         | 1                    | 32.5 |
| Energy Efficiency final         | 14.8                             | 15.2        | 15.8        | very low         | 1                    |      |
| Electric grid interconnectivity | 51                               | N/A         | N/A         |                  |                      |      |

Table S23. Estonia NECPs Recommendations

| Estonia – NECPs Recommendations    |                                 |                       |       |
|------------------------------------|---------------------------------|-----------------------|-------|
| Recommendations                    | N of Recommendations per Policy | Quality of Assessment | Score |
| Decarbonization – GHG              | 1                               | Largely               | 0.750 |
| Decarbonization renew              | 5                               | partially             | 0.100 |
|                                    |                                 | partially             | 0.100 |
| Energy efficiency                  | 2                               | partially             | 0.250 |
|                                    |                                 | partially             | 0.250 |
| Energy security                    | 1                               | partially             | 0.500 |
| Internal energy market             | 1                               | partially             | 0.500 |
| Research and Innovation            | 2                               | partially             | 0.250 |
|                                    |                                 | partially             | 0.250 |
| Regional cooperation               | 2                               | fully                 | 0.500 |
|                                    |                                 | largely               | 0.375 |
| Investment and funding             | 1                               | partially             | 0.500 |
| Energy subsidies                   | 1                               | partially             | 0.500 |
| Air quality                        | 1                               | largely               | 0.750 |
| Just transition and energy poverty | 2                               | partially             | 0.250 |
|                                    |                                 | partially             | 0.250 |
|                                    |                                 |                       | 6.375 |

TableS24. Estonia LTS Scores

| Estonia – LTS                       | Value       | Score |
|-------------------------------------|-------------|-------|
| Overall goal of LTS                 | partial     | 0.5   |
| Scenarios presented in the LTS      | 2 scenarios | 1     |
| GHG reductions                      | modelling   | 1     |
| Renewable energy sources            | N/A         | 0     |
| Energy Efficiency                   | N/A         | 0     |
| Estimated Investment                | N/A         | 0     |
| Socio-Economic impact of transition | assessment  | 1     |
| Adaptation Policies measures        | yes         | 1     |
| Public Consultation                 | limited     | 0.5   |
| Legal status of LTS and targets     | yes         | 1     |
|                                     |             | 6     |

## Finland

Table S25. Finland NECPs Targets

| Finland – NECPs Target       |                                  |             |             |                  |                     |     |
|------------------------------|----------------------------------|-------------|-------------|------------------|---------------------|-----|
| National Target Contribution | Latest Available Data (Oct 2020) | 2020 Target | 2030 Target | Ambition Level   | EU NECs 2030 Target |     |
| GHG                          | -11                              | -16         | -39         | As in ESR (adeq) | 5                   | -40 |
| Renewables energy            | 41.2                             | 38          | 51          | adequate         | 5                   | 32  |

|                                 |      |      |      |          |   |      |
|---------------------------------|------|------|------|----------|---|------|
| Energy Efficiency primary       | 32.7 | 35.9 | 38.4 | very low | 2 | 32.5 |
| Energy Efficiency final         | 25.8 | 26.7 | 24.9 | very low | 2 |      |
| Electric grid interconnectivity | 29   | 18   | 15%  |          |   |      |
|                                 |      |      |      |          |   | 14   |

**Table S26.** Finland NEPCs Recommendations

| <b>Finland – NECPs Recommendations</b> |                                        |                              |              |
|----------------------------------------|----------------------------------------|------------------------------|--------------|
| <b>Recommendations</b>                 | <b>N of Recommendations per Policy</b> | <b>Quality of Assessment</b> | <b>Score</b> |
| Decarbonization – GHG                  | 1                                      | partially                    | 0.500        |
| Decarbonization renew                  | 4                                      | fully                        | 0.250        |
|                                        |                                        | partially                    | 0.125        |
|                                        |                                        | partially                    | 0.125        |
|                                        |                                        | partially                    | 0.125        |
| Energy efficiency                      | 4                                      | partially                    | 0.125        |
|                                        |                                        | partially                    | 0.125        |
|                                        |                                        | partially                    | 0.125        |
|                                        |                                        | partially                    | 0.125        |
| Energy security                        | 2                                      | largely                      | 0.188        |
|                                        |                                        | NA                           | 0.000        |
| Internal energy market                 | 1                                      | No rec                       | 1.000        |
| Research and Innovation                | 1                                      | partially                    | 0.500        |
| Regional cooperation                   | 1                                      | fully                        | 1.000        |
| Investment and funding                 | 1                                      | No rec                       | 1.000        |
| Energy subsidies                       | 3                                      | largely                      | 0.250        |
|                                        |                                        | largely                      | 0.250        |
|                                        |                                        | partially                    | 0.167        |
| Air quality                            | 1                                      | partially                    | 0.500        |
| Just transition and energy poverty     | 1                                      | partially                    | 0.500        |
|                                        |                                        |                              | 6.979        |

**Table S27.** Finland LTS Scores

| <b>Finland – LTS</b>                | <b>Value</b> | <b>Score</b> |
|-------------------------------------|--------------|--------------|
| Overall goal of LTS                 | clear goal   | 1            |
| Scenarios presented in the LTS      | 3 scenarios  | 1            |
| GHG reductions                      | modelling    | 1            |
| Renewable energy sources            | modelling    | 1            |
| Energy Efficiency                   | modelling    | 1            |
| Estimated Investment                | assessment   | 1            |
| Socio-Economic impact of transition | assessment   | 1            |
| Adaptation Policies measures        | limited      | 0.5          |
| Public Consultation                 | yes          | 1            |
| Legal status of LTS and targets     | no           | 0            |
|                                     |              | 8.5          |

France

**Table S28.** France NECPs Targets

| France—NECPs Target             |                                  |             |             |                  |                      |      |
|---------------------------------|----------------------------------|-------------|-------------|------------------|----------------------|------|
| National Target Contribution    | Latest Available Data (Oct 2020) | 2020 Target | 2030 Target | Ambition Level   | EU NECPs 2030 Target |      |
| GHG                             | –14                              | –14         | –37         | As in ESR (adeq) | 5                    | –40  |
| Renewables energy               | 16.6                             | 23          | 33          | adequate         | 5                    | 32   |
| Energy Efficiency primary       | 239.5                            | 219         | 202.2       | modest           | 3                    | 32.5 |
| Energy Efficiency final         | 148.9                            | 131.4       | 120.9       | sufficient       | 6                    |      |
| Electric grid interconnectivity | -                                | -           | 16.50       |                  |                      |      |
|                                 |                                  |             |             |                  |                      | 19   |

Table S29. France NECPs Recommendations

| France—NECPs Recommendations       |                                 |                       |       |
|------------------------------------|---------------------------------|-----------------------|-------|
| Recommendations                    | N of Recommendations per Policy | Quality of Assessment | Score |
| Decarbonization—GHG                | 1                               | No rec                | 1.000 |
| Decarbonization renew              | 5                               | fully                 | 0.200 |
|                                    |                                 | NA                    | 0.000 |
|                                    |                                 | largely               | 0.150 |
|                                    |                                 | NA                    | 0.000 |
|                                    |                                 | partially             | 0.100 |
| Energy efficiency                  | 2                               | partially             | 0.250 |
|                                    |                                 | largely               | 0.375 |
| Energy security                    | 1                               | NA                    | 0.000 |
| Internal energy market             | 1                               | partially             | 0.500 |
| Research and Innovation            | 2                               | partially             | 0.250 |
|                                    |                                 | partially             | 0.250 |
| Regional cooperation               | 4                               | fully                 | 0.188 |
|                                    |                                 | NA                    | 0.000 |
|                                    |                                 | fully                 | 0.188 |
|                                    |                                 | fully                 | 0.188 |
| Investment and funding             | 1                               | No rec                | 1.000 |
| Energy subsidies                   | 3                               | largely               | 0.250 |
|                                    |                                 | largely               | 0.250 |
|                                    |                                 | partially             | 0.167 |
| Air quality                        | 1                               | NA                    | 1.000 |
| Just transition and energy poverty | 1                               | partially             | 0.250 |
|                                    |                                 | fully                 | 0.500 |
|                                    |                                 |                       | 7.054 |

Table S30. France LTS Scores

| France—LTS                     | Value       | Score |
|--------------------------------|-------------|-------|
| Overall goal of LTS            | clear goal  | 1     |
| Scenarios presented in the LTS | 3 scenarios | 1     |
| GHG reductions                 | modelling   | 1     |
| Renewable energy sources       | modelling   | 1     |
| Energy Efficiency              | modelling   | 1     |
| Estimated Investment           | assessment  | 1     |

|                                     |            |     |
|-------------------------------------|------------|-----|
| Socio-Economic impact of transition | assessment | 1   |
| Adaptation Policies measures        | limited    | 0.5 |
| Public Consultation                 | yes        | 1   |
| Legal status of LTS and targets     | no         | 0   |
|                                     |            | 8.5 |

## Germany

**Table S31.** Germany NECPs Targets

| Germany – NECPs Target          |                                  |             |             |                  |                      |      |
|---------------------------------|----------------------------------|-------------|-------------|------------------|----------------------|------|
| National Target Contribution    | Latest Available Data (Oct 2020) | 2020 Target | 2030 Target | Ambition Level   | EU NECPs 2030 Target |      |
| GHG                             | –8                               | –14         | –38         | As in ESR (adeq) | 5                    | –40  |
| Renewables energy               | 16.5                             | 18          | 30          | adequate         | 5                    | 32   |
| Energy Efficiency primary       | 291.7                            | 127.6       | 216         | sufficient       | 6                    | 32,5 |
| Energy Efficiency final         | 215.4                            | 194.3       | 185         | modest           | 3                    |      |
| Electric grid interconnectivity | 11.4                             | 11.4        | not prov    |                  |                      |      |
|                                 |                                  |             |             |                  | 19                   |      |

**Table S32.** Germany NECPs Recommendations

| Germany – NECPs Recommendations |                                 |                       |       |
|---------------------------------|---------------------------------|-----------------------|-------|
| Recommendations                 | N of Recommendations per Policy | Quality of Assessment | Score |
| Decarbonization – GHG           | 1                               | Fully                 | 1.000 |
| Decarbonization renew           | 3                               | partially             | 0.167 |
|                                 |                                 | largely               | 0.250 |
|                                 |                                 | largely               | 0.250 |
| Energy efficiency               | 3                               | largely               | 0.250 |
|                                 |                                 | largely               | 0.250 |
|                                 |                                 | partially             | 0.167 |
| Energy security                 | 1                               | partially             | 0.500 |
| Internal energy market          | 2                               | partially             | 0.250 |
|                                 |                                 | NA                    | 0.000 |
| Research and Innovation         | 2                               | partially             | 0.250 |
|                                 |                                 | partially             | 0.250 |
| Regional cooperation            | 2                               | fully                 | 0.500 |
|                                 |                                 | fully                 | 0.500 |
| Investment and funding          | 3                               | partially             | 0.167 |
|                                 |                                 | largely               | 0.250 |
|                                 |                                 | largely               | 0.250 |
| Energy subsidies                | 3                               | largely               | 0.250 |
|                                 |                                 | largely               | 0.250 |
|                                 |                                 | partially             | 0.167 |
| Air quality                     | 1                               | fully                 | 1.000 |

|                                    |   |           |       |
|------------------------------------|---|-----------|-------|
| Just transition and energy poverty | 2 | partially | 0.250 |
|                                    |   | NA        | 0.000 |
|                                    |   |           | 7.167 |

**Table S33.** Germany LTS Scores

| Germany – LTS                       | Value        | Score |
|-------------------------------------|--------------|-------|
| Overall goal of LTS                 | limited      | 0.5   |
| Scenarios presented in the LTS      | no scenarios | 0     |
| GHG reductions                      | modelling    | 1     |
| Renewable energy sources            | N/A          | 0     |
| Energy Efficiency                   | N/A          | 0     |
| Estimated Investment                | N/A          | 0     |
| Socio-Economic impact of transition | N/A          | 0     |
| Adaptation Policies measures        | no           | 0     |
| Public Consultation                 | limited      | 0.5   |
| Legal status of LTS and targets     | unspecified  | 0     |
|                                     |              | 2     |

Greece

**Table S34.** Greece NECPs Targets

| Greece – NECPs Target           |                                  |             |             |                               |                      |      |
|---------------------------------|----------------------------------|-------------|-------------|-------------------------------|----------------------|------|
| National Target Contribution    | Latest Available Data (Oct 2020) | 2020 Target | 2030 Target | Ambition Level                | EU NECPs 2030 Target |      |
| GHG                             | -28                              | -4          | -16         | As in ESR total higher reduct | 5                    | -40  |
| Renewables energy               | 18                               | 18          | 35          | suff ambit                    | 6                    | 32   |
| Energy Efficiency primary       | 22.64                            | 22.68       | 20.55       | modest                        | 3                    | 32.5 |
| Energy Efficiency final         | 16                               | 16.93       | 16.51       | low                           | 1                    |      |
| Electric grid interconnectivity | 10                               | 13          | 21.00       |                               |                      |      |
|                                 |                                  |             |             |                               | 15                   |      |

**Table S35.** Greece NECPs Recommendations

| Greece – NECPs Recommendations |                                 |                       |       |
|--------------------------------|---------------------------------|-----------------------|-------|
| Recommendations                | N of Recommendations per Policy | Quality of Assessment | Score |
| Decarbonization – GHG          | 1                               | No rec                | 1.000 |
| Decarbonization renew          | 3                               | largely               | 0.250 |
|                                |                                 | partially             | 0.167 |
|                                |                                 | largely               | 0.250 |
| Energy efficiency              | 2                               | largely               | 0.375 |
|                                |                                 | partially             | 0.250 |
| Energy security                | 2                               | largely               | 0.375 |
|                                |                                 | largely               | 0.375 |
| Internal energy market         | 2                               | largely               | 0.375 |
|                                |                                 | largely               | 0.375 |
| Research and Innovation        | 1                               | partially             | 0.500 |
| Regional cooperation           | 5                               | partially             | 0.100 |
|                                |                                 | partially             | 0.100 |

|                                    |   |           |       |
|------------------------------------|---|-----------|-------|
|                                    |   | partially | 0.100 |
|                                    |   | partially | 0.100 |
|                                    |   | partially | 0.100 |
| Investment and funding             | 1 | NA        | 1.000 |
| Energy subsidies                   | 3 | partially | 0.167 |
|                                    |   | partially | 0.167 |
|                                    |   | partially | 0.167 |
| Air quality                        | 1 | partially | 0.500 |
| Just transition and energy poverty | 1 | partially | 0.250 |
|                                    |   | largely   | 0.375 |
|                                    |   |           | 7.417 |

**Table S36.** Greece LTS Scores

| Greece – LTS                        | Value       | Score |
|-------------------------------------|-------------|-------|
| Overall goal of LTS                 | limited     | 0.5   |
| Scenarios presented in the LTS      | 4 scenarios | 1     |
| GHG reductions                      | modelling   | 1     |
| Renewable energy sources            | modelling   | 1     |
| Energy Efficiency                   | modelling   | 1     |
| Estimated Investment                | assessment  | 1     |
| Socio-Economic impact of transition | N/A         | 0     |
| Adaptation Policies measures        | no          | 0     |
| Public Consultation                 | limited     | 0.5   |
| Legal status of LTS and targets     | no          | 0     |
|                                     |             | 6     |

## Hungary

**Table S37.** Hungary NECPs Targets

| Hungary – NECPs Target          |                                  |             |             |                |    | EU NECPs    |
|---------------------------------|----------------------------------|-------------|-------------|----------------|----|-------------|
| National Target Contribution    | Latest Available Data (Oct 2020) | 2020 Target | 2030 Target | Ambition Level |    | 2030 Target |
| GHG                             | -10                              | 10          | -7          | As in ESR      | 5  | -40         |
| Renewables energy               | 12.5                             | 13          | 21          | unambitious    | 4  | 32          |
| Energy Efficiency primary       | 24.5                             | 24.1        | no target   | very low       | 1  | 32.5        |
| Energy Efficiency final         | 18.5                             | 14.4        | 18.7        | very low       | 1  |             |
| Electric grid interconnectivity | 50                               | 55          | 60.00       |                |    |             |
|                                 |                                  |             |             |                | 11 |             |

**Table S38.** Hungary NECPs Recommendations

| Hungary – NECPs Recommendations |                                 |                       |       |
|---------------------------------|---------------------------------|-----------------------|-------|
| Recommendations                 | N of Recommendations per Policy | Quality of Assessment | Score |
| Decarbonization – GHG           | 1                               | No rec                | 1.000 |
| Decarbonization renew           | 6                               | partially             | 0.083 |
|                                 |                                 | partially             | 0.083 |
|                                 |                                 | fully                 | 0.167 |
|                                 |                                 | fully                 | 0.167 |

|                                    |   |           |       |
|------------------------------------|---|-----------|-------|
|                                    |   | fully     | 0.167 |
|                                    |   | fully     | 0.167 |
| Energy efficiency                  | 3 | NA        | 0.000 |
|                                    |   | partially | 0.167 |
|                                    |   | partially | 0.167 |
| Energy security                    | 1 | partially | 0.500 |
| Internal energy market             | 1 | partially | 0.500 |
| Research and Innovation            | 2 | partially | 0.250 |
|                                    |   | partially | 0.250 |
| Regional cooperation               | 2 | largely   | 0.250 |
|                                    |   | NA        | 0.000 |
| Investment and funding             | 3 | largely   | 0.250 |
|                                    |   | largely   | 0.250 |
|                                    |   | NA        | 0.000 |
| Energy subsidies                   | 3 | partially | 0.167 |
|                                    |   | partially | 0.167 |
|                                    |   | NA        | 0.000 |
| Air quality                        | 1 | NA        | 0.000 |
| Just transition and energy poverty | 2 | NA        | 0.000 |
|                                    |   | partially | 0.250 |
|                                    |   |           | 5.000 |

**Table S39.** Hungary LTS Scores

| <b>Hungary – LTS</b>                | <b>Value</b>       | <b>Score</b> |
|-------------------------------------|--------------------|--------------|
| Overall goal of LTS                 | climate neutrality | 1            |
| Scenarios presented in the LTS      | 3 scenarios        | 1            |
| GHG reductions                      | modelling          | 1            |
| Renewable energy sources            | modelling          | 1            |
| Energy Efficiency                   | modelling          | 1            |
| Estimated Investment                | assessment         | 1            |
| Socio-Economic impact of transition | assessment         | 1            |
| Adaptation Policies measures        | yes                | 1            |
| Public Consultation                 | yes                | 1            |
| Legal status of LTS and targets     | yes                | 1            |
|                                     |                    | 10           |

#### Ireland

**Table S40.** Ireland NECPs Targets

| <b>Ireland – NECPs target</b>       |                                         |                    |                    |                       |                             |      |
|-------------------------------------|-----------------------------------------|--------------------|--------------------|-----------------------|-----------------------------|------|
| <b>National Target Contribution</b> | <b>Latest Available Data (Oct 2020)</b> | <b>2020 Target</b> | <b>2030 Target</b> | <b>Ambition Level</b> | <b>EU NECPs 2030 Target</b> |      |
| GHG                                 | –4                                      | –20                | –30                | As in ESR             | 5                           | –40  |
| Renewables energy                   | 11                                      | 12.8               | 34.1               | suffic                | 6                           | 32   |
| Energy Efficiency primary           | 14.5                                    | 13.9               | 13.7               | low                   | 2                           | 32.5 |
| Energy Efficiency final             | 12.3                                    | 11.7               | 11.2               | low                   | 2                           |      |
| Electric grid interconnectivity     | 7.4                                     | N/A                | N/A                |                       |                             |      |
|                                     |                                         |                    |                    |                       | 15                          |      |

**Table S41.** Ireland NECPs Recommendations

| Ireland – NECPs Recommendations    |                                    |                       |       |
|------------------------------------|------------------------------------|-----------------------|-------|
| Recommendations                    | N of Recommendations<br>per Policy | Quality of Assessment | Score |
| Decarbonization – GHG              | 1                                  | largely               | 0.750 |
| Decarbonization renew              | 6                                  | fully                 | 0.167 |
|                                    |                                    | NA                    | 0.000 |
|                                    |                                    | partially             | 0.083 |
|                                    |                                    | NA                    | 0.000 |
|                                    |                                    | partially             | 0.083 |
|                                    |                                    | partially             | 0.083 |
| Energy efficiency                  | 5                                  | partially             | 0.100 |
|                                    |                                    | fully                 | 0.200 |
|                                    |                                    | partially             | 0.100 |
|                                    |                                    | NA                    | 0.000 |
|                                    |                                    | partially             | 0.100 |
| Energy security                    | 2                                  | partially             | 0.250 |
|                                    |                                    | partially             | 0.250 |
| Internal energy market             | 1                                  | No rec                | 1.000 |
| Research and Innovation            | 2                                  | partially             | 0.250 |
|                                    |                                    | partially             | 0.250 |
| Regional cooperation               | 2                                  | fully                 | 0.500 |
|                                    |                                    | fully                 | 0.500 |
| Investment and funding             | 1                                  | No rec                | 1.000 |
| Energy subsidies                   | 3                                  | largely               | 0.250 |
|                                    |                                    | partially             | 0.167 |
|                                    |                                    | partially             | 0.167 |
| Air quality                        | 3                                  | Largely               | 0.250 |
|                                    |                                    | largely               | 0.250 |
|                                    |                                    | largely               | 0.250 |
| Just transition and energy poverty | 3                                  | partially             | 0.167 |
|                                    |                                    | fully                 | 0.333 |
|                                    |                                    | partially             | 0.167 |
|                                    |                                    |                       | 7.667 |

**Table S42.** Ireland LTS Scores

| Ireland – LTS                       | Value | Score |
|-------------------------------------|-------|-------|
| Overall goal of LTS                 |       |       |
| Scenarios presented in the LTS      |       |       |
| GHG reductions                      |       |       |
| Renewable energy sources            |       |       |
| Energy Efficiency                   |       |       |
| Estimated Investment                |       |       |
| Socio-Economic impact of transition |       |       |
| Adaptation Policies measures        |       |       |
| Public Consultation                 |       |       |
| Legal status of LTS and targets     |       |       |

Italy

**Table S43.** Italy NECPs Targets

| Ireland – NECPs Target          |                                  |             |             |                |                      |      |
|---------------------------------|----------------------------------|-------------|-------------|----------------|----------------------|------|
| National Target Contribution    | Latest Available Data (Oct 2020) | 2020 Target | 2030 Target | Ambition Level | EU NECPs 2030 Target |      |
| GHG                             | –18                              | –13         | –33         | As in ESR      | 5                    | –40  |
| Renewables energy               | 17.8                             | 17          | 30          | suff ambit     | 6                    | 32   |
| Energy Efficiency primary       | 147.2                            | 158         | 125.1       | suff           | 6                    | 32.5 |
| Energy Efficiency final         | 116.5                            | 124         | 103.8       | suff           | 6                    |      |
| Electric grid interconnectivity | 7.4                              | N/A         | N/A         |                |                      |      |
|                                 |                                  |             |             |                | 23                   |      |

Table S44. Italy LTS Scores

| Italy – LTS                         | Value              | Score |
|-------------------------------------|--------------------|-------|
| Overall goal of LTS                 | climate neutrality | 1     |
| Scenarios presented in the LTS      | 3 scenarios        | 1     |
| GHG reductions                      | modelling          | 1     |
| Renewable energy sources            | modelling          | 1     |
| Energy Efficiency                   | modelling          | 1     |
| Estimated Investment                | NA                 | 0     |
| Socio-Economic impact of transition | assessment         | 1     |
| Adaptation Policies measures        | yes                | 1     |
| Public Consultation                 | yes                | 1     |
| Legal status of LTS and targets     | No                 | 0     |
|                                     |                    | 8     |

Table S45. Italy NECPs Recommendations

| Italy – NECPs Recommendations |           |                   |       |
|-------------------------------|-----------|-------------------|-------|
| Recommendations               | N of Recc | Policy Assessment | Score |
| Decarbonization – GHG         | 1         | No rec            | 1.000 |
| Decarbonization renew         | 4         | partially         | 0.125 |
|                               |           | largely           | 0.188 |
|                               |           | largely           | 0.188 |
|                               |           | largely           | 0.188 |
| Energy efficiency             | 3         | partially         | 0.167 |
|                               |           | partially         | 0.167 |
|                               |           | largely           | 0.250 |
| Energy security               | 3         | partially         | 0.167 |
|                               |           | partially         | 0.167 |
|                               |           | partially         | 0.167 |
| Internal energy market        | 1         | partially         | 0.500 |
| Research and Innovation       | 2         | NA                | 0.000 |
|                               |           | partially         | 0.250 |
| Regional cooperation          | 2         | partially         | 0.250 |
|                               |           | partially         | 0.250 |
| Investment and funding        | 1         | No rec            | 1.000 |
| Energy subsidies              | 1         | largely           | 0.750 |
| Air quality                   | 1         | fully             | 1.000 |

|                                    |   |           |       |
|------------------------------------|---|-----------|-------|
| Just transition and energy poverty | 2 | partially | 0.250 |
|                                    |   | partially | 0.250 |
|                                    |   |           | 7.271 |

## Latvia

**Table S46.** Latvia NECPs Targets

| Latvia – NECPs Target           |                                  |             |             |                |    |                      |
|---------------------------------|----------------------------------|-------------|-------------|----------------|----|----------------------|
| National Target Contribution    | Latest Available Data (Oct 2020) | 2020 Target | 2030 Target | Ambition Level |    | EU NECPs 2030 Target |
| GHG                             | 8                                | 17          | –6          | As in ESR      | 5  | –40                  |
| Renewables energy               | 40                               | 40          | 50          | suff ambit     | 6  | 32                   |
| Energy Efficiency primary       | 4.7                              | 5.4         | 4.1         | modest         | 3  | 32.5                 |
| Energy Efficiency final         | 4.2                              | 4.5         | 3.6         | modest         | 3  |                      |
| Electric grid interconnectivity | 7,4                              | N/A         | N/A         |                |    |                      |
|                                 |                                  |             |             |                | 17 |                      |

**Table S47.** Latvia NECPs Recommendations

| Latvia – NECPs Recommendations     |          |                   |       |
|------------------------------------|----------|-------------------|-------|
| Recommendations                    | N of Rec | Policy Assessment | Score |
| Decarbonization – GHG              | 1        | NA                | 0.000 |
| Decarbonization renew              | 5        | fully             | 0.200 |
|                                    |          | partially         | 0.100 |
|                                    |          | partially         | 0.100 |
|                                    |          | NA                | 0.000 |
|                                    |          | NA                | 0.000 |
| Energy efficiency                  | 2        | largely           | 0.375 |
|                                    |          | partially         | 0.250 |
| Energy security                    | 1        | partially         | 0.500 |
| Internal energy market             | 1        | partially         | 0.500 |
| Research and Innovation            | 2        | NA                | 0.000 |
|                                    |          | NA                | 0.000 |
| Regional cooperation               | 1        | largely           | 0.750 |
| Investment and funding             | 1        | No rec            | 1.000 |
| Energy subsidies                   | 3        | largely           | 0.250 |
|                                    |          | largely           | 0.250 |
|                                    |          | largely           | 0.250 |
| Air quality                        | 1        | partially         | 0.500 |
| Just transition and energy poverty | 2        | partially         | 0.250 |
|                                    |          | partially         | 0.250 |
|                                    |          |                   | 5.525 |

## Lithuania

**Table S48.** Lithuania NECPs Targets

| Lithuania – NECPs Target     |                  |             |             |                |          |            |
|------------------------------|------------------|-------------|-------------|----------------|----------|------------|
| National Target Contribution | Latest Available | 2020 Target | 2030 Target | Ambition Level | EU NECPs | Green Deal |

|                                 | Data (Oct 2020) |     |     |            | 2030 Target |      |    |
|---------------------------------|-----------------|-----|-----|------------|-------------|------|----|
| GHG                             | 7               | 15  | -9  | As in ESR  | 5           | -40  | 55 |
| Renewables energy               | 24              | 23  | 45  | suff ambit | 6           | 32   | 40 |
| Energy Efficiency primary       | 6.3             | 6.5 | 5.5 | modest     | 3           | 32.5 | 39 |
| Energy Efficiency final         | 5.5             | 4.3 | 4.5 | modest     | 3           |      |    |
| Electric grid interconnectivity | 7.4             | N/A | N/A |            |             |      |    |
| 17                              |                 |     |     |            |             |      |    |

**Table S49.** Lithuania NECPs Recommendations

| Lithuania – NECPs Recommendations  |          |                   |       |
|------------------------------------|----------|-------------------|-------|
| Recommendations                    | N of Rec | Policy Assessment | Score |
| Decarbonization – GHG              | 1        | largely           | 0.750 |
| Decarbonization renew              | 4        | fully             | 0.250 |
|                                    |          | fully             | 0.250 |
|                                    |          | Largely           | 0.188 |
|                                    |          | largely           | 0.188 |
| Energy efficiency                  | 4        | partially         | 0.125 |
|                                    |          | largely           | 0.188 |
|                                    |          | largely           | 0.188 |
|                                    |          | largely           | 0.188 |
| Energy security                    | 3        | fully             | 0.250 |
|                                    |          | partially         | 0.167 |
|                                    |          | partially         | 0.167 |
| Internal energy market             | 1        | largely           | 0.750 |
| Research and Innovation            | 1        | partially         | 0.500 |
| Regional cooperation               | 2        | largely           | 0.375 |
|                                    |          | fully             | 0.500 |
| Investment and funding             | 1        | largely           | 0.750 |
| Energy subsidies                   | 3        | partially         | 0.167 |
|                                    |          | largely           | 0.250 |
|                                    |          | largely           | 0.250 |
| Air quality                        | 1        | largely           | 0.750 |
| Just transition and energy poverty | 2        | partially         | 0.250 |
|                                    |          | fully             | 0.500 |
|                                    |          |                   | 7.938 |

**Table S50.** Lithuania LTS Scores

| Lithuania – LTS                     |                    |       |
|-------------------------------------|--------------------|-------|
| Lithuania – LTS                     | Value              | Score |
| Overall goal of LTS                 | climate neutrality | 1     |
| Scenarios presented in the LTS      | 0 scenarios        | 0     |
| GHG reductions                      | modelling          | 1     |
| Renewable energy sources            | modelling          | 1     |
| Energy Efficiency                   | NA                 | 0     |
| Estimated Investment                | NA                 | 0     |
| Socio-Economic impact of transition | NA                 | 0     |
| Adaptation Policies measures        | yes                | 1     |
| Public Consultation                 | no                 | 0     |
| Legal status of LTS and targets     | no                 | 0     |

## Luxembourg

Table S51. Luxembourg NECPs Targets

| Luxembourg – NECPs Target       |                                  |             |             |                |    |                      |
|---------------------------------|----------------------------------|-------------|-------------|----------------|----|----------------------|
| National Target Contribution    | Latest Available Data (Oct 2020) | 2020 Target | 2030 Target | Ambition Level |    | EU NECPs 2030 Target |
| GHG                             | -10                              | -20         | -40         | more ambitious | 7  | -40                  |
| Renewables energy               | 9.1                              | 11          | 25          | suff ambit     | 6  | 32                   |
| Energy Efficiency primary       | 4.46                             | 4.48        | N/A         | N/A            | 1  | 32.5                 |
| Energy Efficiency final         | 4.35                             | 4.24        | 3.06        | suff ambit     | 3  |                      |
| Electric grid interconnectivity | -                                | 270         | 400         |                |    |                      |
|                                 |                                  |             |             |                | 17 |                      |

Table S52. Luxembourg NECPs Recommendations

| Luxembourg—NECPs Recommendations   |          |                   |       |
|------------------------------------|----------|-------------------|-------|
| Recommendations                    | N of Rec | Policy Assessment | Score |
| Decarbonization—GHG                | 2        | largely           | 0.375 |
|                                    |          | partially         | 0.250 |
| Decarbonization renew              | 4        | partially         | 0.125 |
|                                    |          | partially         | 0.125 |
|                                    |          | largely           | 0.188 |
|                                    |          | partially         | 0.125 |
|                                    |          |                   |       |
| Energy efficiency                  | 2        | partially         | 0.250 |
|                                    |          | NA                | 0.000 |
| Energy security                    | 1        | No rec            | 1.000 |
| Internal energy market             | 1        | No rec            | 1.000 |
| Research and Innovation            | 2        | partially         | 0.250 |
|                                    |          | NA                | 0.000 |
| Regional cooperation               | 2        | largely           | 0.250 |
|                                    |          | largely           | 0.250 |
| Investment and funding             | 1        | partially         | 0.500 |
| Energy subsidies                   | 3        | partially         | 0.167 |
|                                    |          | NA                | 0.000 |
|                                    |          | partially         | 0.167 |
| Air quality                        | 1        | partially         | 0.500 |
| Just transition and energy poverty | 2        | partially         | 0.250 |
|                                    |          | largely           | 0.375 |
|                                    |          |                   | 6.146 |

Table S53. Luxembourg LTS Scores

| Luxembourg – LTS               | Value              | Score |
|--------------------------------|--------------------|-------|
| Overall goal of LTS            | climate neutrality | 0     |
| Scenarios presented in the LTS | 0 scenarios        | 0     |
| GHG reductions                 | modelling          | 0     |
| Renewable energy sources       | modelling          | 0     |
| Energy Efficiency              | NA                 | 0     |
| Estimated Investment           | NA                 | 0     |

|                                     |     |   |
|-------------------------------------|-----|---|
| Socio-Economic impact of transition | NA  | 0 |
| Adaptation Policies measures        | yes | 0 |
| Public Consultation                 | no  | 0 |
| Legal status of LTS and targets     | no  | 0 |
|                                     |     | ? |

## Malta

**Table S54. Malta NECPs Targets**

| Malta – NECPs Target            |                                  |             |             |                |    |                      |            |
|---------------------------------|----------------------------------|-------------|-------------|----------------|----|----------------------|------------|
| National Target Contribution    | Latest Available Data (Oct 2020) | 2020 Target | 2030 Target | Ambition Level |    | EU NECPs 2030 Target | Green Deal |
| GHG                             | 32                               | 5           | –19         | As in ESR      | 5  | –40                  | 55         |
| Renewables energy               | 8                                | 10          | 11.5        | non ambit      | 4  | 32                   | 40         |
| Energy Efficiency primary       | 0.8                              | 0.8         | 1.1         | very low       | 1  | 32.5                 | 39         |
| Energy Efficiency final         | 0.7                              | 0.6         | 0.8         | very low       | 1  |                      |            |
| Electric grid interconnectivity | 24                               | 24          | 24          |                |    |                      |            |
|                                 |                                  |             |             |                | 11 |                      |            |

**Table S55. Malta NECPs Recommendations**

| Malta – NECPs Recommendations      |          |                   |       |
|------------------------------------|----------|-------------------|-------|
| Recommendations                    | N of Rec | Policy Assessment | Score |
| Decarbonization – GHG              | 1        | NA                | 0.000 |
| Decarbonization renew              | 6        | NA                | 0.000 |
|                                    |          | fully             | 0.167 |
|                                    |          | fully             | 0.167 |
|                                    |          | partially         | 0.083 |
|                                    |          | partially         | 0.083 |
|                                    |          | fully             | 0.167 |
| Energy efficiency                  | 2        | partially         | 0.250 |
|                                    |          | partially         | 0.250 |
| Energy security                    | 1        | partially         | 0.500 |
| Internal energy market             | 1        | partially         | 0.500 |
| Research and Innovation            | 2        | partially         | 0.250 |
|                                    |          | partially         | 0.250 |
| Regional cooperation               | 1        | No rec            | 1.000 |
| Investment and funding             | 1        | partially         | 0.500 |
| Energy subsidies                   | 3        | partially         | 0.167 |
|                                    |          | NA                | 0.000 |
|                                    |          | NA                | 0.000 |
| Air quality                        | 1        | Fully             | 1.000 |
| Just transition and energy poverty | 1        | largely           | 0.750 |
|                                    |          |                   | 6.083 |

**Table S56. Malta LTS Scores**

| Malta – LTS                    | Value              | Score |
|--------------------------------|--------------------|-------|
| Overall goal of LTS            | climate neutrality | 0     |
| Scenarios presented in the LTS | 0 scenarios        | 0     |

|                                     |           |   |
|-------------------------------------|-----------|---|
| GHG reductions                      | modelling | 0 |
| Renewable energy sources            | modelling | 0 |
| Energy Efficiency                   | NA        | 0 |
| Estimated Investment                | NA        | 0 |
| Socio-Economic impact of transition | NA        | 0 |
| Adaptation Policies measures        | yes       | 0 |
| Public Consultation                 | no        | 0 |
| Legal status of LTS and targets     | no        | 0 |
|                                     |           | 0 |

## Netherlands

**Table S57.** Netherlands NECPs Targets

| Netherlands – NECPs Target      |                                  |                |             |                |   |                      |            |
|---------------------------------|----------------------------------|----------------|-------------|----------------|---|----------------------|------------|
| National Target Contribution    | Latest Available Data (Oct 2020) | 2020 Target    | 2030 Target | Ambition Level |   | EU NECPs 2030 Target | Green Deal |
| GHG                             | –20                              | –16            | –36         | As in ESR      | 5 | –40                  | 55         |
| Renewables energy               | 26                               | 14             | 27          | suff amb       | 6 | 32                   | 40         |
| Energy Efficiency primary       | 64.73                            | no targ        | 46.6        | suff           | 6 | 32.5                 | 39         |
| Energy Efficiency final         | 50.27                            | no spec target | 43.9        | modest         | 3 |                      |            |
| Electric grid interconnectivity | 24                               | 24             | 24          |                |   |                      |            |
|                                 |                                  |                |             |                |   | 20                   |            |

**Table S58.** Netherlands NECPs Recommendations

| Netherlands – NECPs Recommendations |          |                   |       |
|-------------------------------------|----------|-------------------|-------|
| Recommendations                     | N of Rec | Policy Assessment | Score |
| Decarbonization – GHG               | 1        | No rec            | 1.000 |
| Decarbonization renew               | 4        | partially         | 0.125 |
|                                     |          | partially         | 0.125 |
|                                     |          | largely           | 0.188 |
|                                     |          | partially         | 0.125 |
| Energy efficiency                   | 3        | largely           | 0.250 |
|                                     |          | largely           | 0.250 |
|                                     |          | NA                | 0.000 |
| Energy security                     | 1        | partially         | 0.500 |
| Internal energy market              | 1        | No rec            | 1.000 |
| Research and Innovation             | 1        | largely           | 0.750 |
| Regional cooperation                | 1        | fully             | 1.000 |
| Investment and funding              | 1        | largely           | 0.750 |
| Energy subsidies                    | 3        | partially         | 0.167 |
|                                     |          | partially         | 0.167 |
|                                     |          | NA                | 0.000 |
| Air quality                         | 1        | partially         | 0.500 |
| Just transition and energy poverty  | 2        | largely           | 0.375 |
|                                     |          | NA                | 0.000 |
|                                     |          |                   | 7.271 |

**Table S59.** Netherlands LTS Scores

| <b>Netherlands – LTS</b>            | <b>Value</b> | <b>Score</b> |
|-------------------------------------|--------------|--------------|
| Overall goal of LTS                 | clear goal   | 1            |
| Scenarios presented in the LTS      | 0 scenarios  | 0            |
| GHG reductions                      | modelling    | 1            |
| Renewable energy sources            | NA           | 0            |
| Energy Efficiency                   | NA           | 0            |
| Estimated Investment                | NA           | 0            |
| Socio-Economic impact of transition | NA           | 0            |
| Adaptation Policies measures        | limited      | 0,5          |
| Public Consultation                 | limited      | 0,5          |
| Legal status of LTS and targets     | yes          | 1            |
|                                     |              | 4            |

## Poland

**Table S60.** Poland NECPs Targets

| <b>Poland – NECPs Target</b>        |                                         |                    |                    |                       |                             |      |
|-------------------------------------|-----------------------------------------|--------------------|--------------------|-----------------------|-----------------------------|------|
| <b>National Target Contribution</b> | <b>Latest Available Data (Oct 2020)</b> | <b>2020 Target</b> | <b>2030 Target</b> | <b>Ambition Level</b> | <b>EU NECPs 2030 Target</b> |      |
| GHG                                 | 21                                      | 14                 | 7                  | As in ESR             | 5                           | –40  |
| Renewables energy                   | 11,3                                    | 15                 | 22                 | not amb               | 4                           | 32   |
| Energy Efficiency primary           | 100,9                                   | 96,4               | 91,3               | modest                | 3                           | 32,5 |
| Energy Efficiency final             | 71,8                                    | 71,6               | 67,1               | modest                | 3                           |      |
| Electric grid interconnectivity     | 4                                       | 4                  | 8,7                |                       |                             |      |
|                                     |                                         |                    |                    |                       | 15                          |      |

**Table S61.** Poland NECPs Recommendations

| <b>Poland – NECPs Recommendations</b> |                 |                          |              |
|---------------------------------------|-----------------|--------------------------|--------------|
| <b>Recommendations</b>                | <b>N of Rec</b> | <b>Policy Assessment</b> | <b>Score</b> |
| Decarbonization – GHG                 | 2               | largely                  | 0.375        |
|                                       |                 | partially                | 0.250        |
|                                       |                 | NA                       | 0.000        |
| Decarbonization renew                 | 7               | partially                | 0.071        |
|                                       |                 | fully                    | 0.143        |
|                                       |                 | partially                | 0.071        |
|                                       |                 | fully                    | 0.143        |
|                                       |                 | partially                | 0.071        |
|                                       |                 | partially                | 0.071        |
|                                       |                 | partially                | 0.071        |
| Energy efficiency                     | 4               | NA                       | 0.000        |
|                                       |                 | partially                | 0.125        |
|                                       |                 | partially                | 0.125        |
|                                       |                 | largely                  | 0.188        |
| Energy security                       | 1               | largely                  | 0.750        |
| Internal energy market                | 1               | partially                | 0.500        |
| Research and Innovation               | 1               | partially                | 0.500        |
| Regional cooperation                  | 2               | fully                    | 0.500        |
|                                       |                 | largely                  | 0.375        |
| Investment and funding                | 1               | No rec                   | 1.000        |

|                                    |   |           |       |
|------------------------------------|---|-----------|-------|
| Energy subsidies                   | 3 | largely   | 0.250 |
|                                    |   | partially | 0.167 |
|                                    |   | partially | 0.167 |
| Air quality                        | 1 | partially | 0.500 |
| Just transition and energy poverty | 3 | partially | 0.167 |
|                                    |   | partially | 0.167 |
|                                    |   | NA        | 0.000 |
|                                    |   |           | 6.747 |

**Table S62.** Poland LTS Scores

| <b>Poland – LTS</b>                 | <b>Value</b> | <b>Score</b> |
|-------------------------------------|--------------|--------------|
| Overall goal of LTS                 | clear goal   | 0            |
| Scenarios presented in the LTS      | 0 scenarios  | 0            |
| GHG reductions                      | modelling    | 0            |
| Renewable energy sources            | NA           | 0            |
| Energy Efficiency                   | NA           | 0            |
| Estimated Investment                | NA           | 0            |
| Socio-Economic impact of transition | NA           | 0            |
| Adaptation Policies measures        | limited      | 0            |
| Public Consultation                 | limited      | 0            |
| Legal status of LTS and targets     | yes          | 0            |
|                                     |              | 0            |

Portugal

**Table S63.** Portugal NECPs Targets

| <b>Portugal – NECPs Target</b>      |                                         |                    |                    |                       |                             |      |
|-------------------------------------|-----------------------------------------|--------------------|--------------------|-----------------------|-----------------------------|------|
| <b>National Target Contribution</b> | <b>Latest Available Data (Oct 2020)</b> | <b>2020 Target</b> | <b>2030 Target</b> | <b>Ambition Level</b> | <b>EU NECPs 2030 Target</b> |      |
| GHG                                 | –16                                     | 1                  | –17                | As in ESR             | 5                           | –40  |
| Renewables energy                   | 30.3                                    | 31                 | 47                 | suff ambv             | 6                           | 32   |
| Energy Efficiency primary           | 22.6                                    | 22.5               | 21.5               | modest                | 3                           | 32.5 |
| Energy Efficiency final             | 16.9                                    | 17.4               | 14.9               | modest                | 3                           |      |
| Electric grid interconnectivity     | 8                                       | 10                 | 15                 |                       |                             |      |
|                                     |                                         |                    |                    |                       | 17                          |      |

**Table S64.** Portugal NECPs Recommendations

| <b>Portugal – NECPs Recommendation</b> |                 |                          |              |
|----------------------------------------|-----------------|--------------------------|--------------|
| <b>Recommendations</b>                 | <b>N of Rec</b> | <b>Policy Assessment</b> | <b>Score</b> |
| Decarbonization – GHG                  | 1               | partially                | 0.500        |
| Decarbonization renew                  | 4               | largely                  | 0.188        |
|                                        |                 | NA                       | 0.000        |
|                                        |                 | partially                | 0.125        |
|                                        |                 | fully                    | 0.250        |
| Energy efficiency                      | 3               | partially                | 0.167        |
|                                        |                 | partially                | 0.167        |
|                                        |                 | partially                | 0.167        |

|                                    |   |           |       |
|------------------------------------|---|-----------|-------|
| Energy security                    | 1 | No rec    | 1.000 |
| Internal energy market             | 1 | largely   | 0.750 |
| Research and Innovation            | 2 | partially | 0.250 |
|                                    |   | partially | 0.250 |
| Regional cooperation               | 2 | fully     | 0.500 |
|                                    |   | partially | 0.250 |
| Investment and funding             | 3 | largely   | 0.250 |
|                                    |   | largely   | 0.250 |
|                                    |   | NA        | 0.000 |
| Energy subsidies                   | 3 | partially | 0.167 |
|                                    |   | largely   | 0.250 |
|                                    |   | largely   | 0.250 |
| Air quality                        | 1 | partially | 0.500 |
| Just transition and energy poverty | 2 | partially | 0.250 |
|                                    |   | partially | 0.250 |
|                                    |   |           | 6.729 |

**Table S65.** Portugal LTS Scores

| <b>Portugal – LTS</b>               | <b>Value</b>       | <b>Score</b> |
|-------------------------------------|--------------------|--------------|
| Overall goal of LTS                 | climate neutrality | 1            |
| Scenarios presented in the LTS      | 3 scenarios        | 1            |
| GHG reductions                      | modelling          | 1            |
| Renewable energy sources            | modelling          | 1            |
| Energy Efficiency                   | modelling          | 1            |
| Estimated Investment                | assessment         | 1            |
| Socio-Economic impact of transition | assessment         | 1            |
| Adaptation Policies measures        | limited            | 0,5          |
| Public Consultation                 | limited            | 0,5          |
| Legal status of LTS and targets     | no                 | 0            |
|                                     |                    | 8            |

**Table S66.** Romania NECPs Targets

| <b>Romania – NECPs Target</b>       |                                             |                    |                    |                           |                                     |      |
|-------------------------------------|---------------------------------------------|--------------------|--------------------|---------------------------|-------------------------------------|------|
| <b>National Target Contribution</b> | <b>Latest Available Data<br/>(Oct 2020)</b> | <b>2020 Target</b> | <b>2030 Target</b> | <b>Ambition<br/>Level</b> | <b>EU NECPs<br/>2030<br/>Target</b> |      |
| GHG                                 | 14                                          | 19                 | –2                 | As in ESR                 | 5                                   | –40  |
| Renewables energy                   | 23.9                                        | 24                 | 30.7               | non amb                   | 4                                   | 32   |
| Energy Efficiency primary           | 32.6                                        | 43                 | 32.3               | low                       | 2                                   | 32.5 |
| Energy Efficiency final             | 23.6                                        | 30.3               | 25.7               | very low                  | 1                                   |      |
| Electric grid interconnectivity     | 9.3                                         | 10                 | 15.4               |                           |                                     |      |
|                                     |                                             |                    |                    |                           | 12                                  |      |

**Table S67.** Romania NECPs Recommendations

| <b>Romania – NECPs Recommendations</b> |                 |                              |              |
|----------------------------------------|-----------------|------------------------------|--------------|
| <b>Recommendations</b>                 | <b>N of Rec</b> | <b>Policy<br/>Assessment</b> | <b>Score</b> |
| Decarbonization – GHG                  | 1               | No rec                       | 1.000        |
| Decarbonization renew                  | 6               | partially                    | 0.083        |

|                                    |   |           |       |
|------------------------------------|---|-----------|-------|
|                                    |   | partially | 0.083 |
| Energy efficiency                  | 2 | partially | 0.250 |
|                                    |   | partially | 0.250 |
| Energy security                    | 2 | largely   | 0.375 |
|                                    |   | partially | 0.250 |
| Internal energy market             | 2 | largely   | 0.375 |
|                                    |   | largely   | 0.375 |
| Research and Innovation            | 2 | NA        | 0.000 |
|                                    |   | NA        | 0.000 |
| Regional cooperation               | 2 | partially | 0.250 |
|                                    |   | partially | 0.250 |
| Investment and funding             | 3 | partially | 0.167 |
|                                    |   | partially | 0.167 |
|                                    |   | partially | 0.167 |
| Energy subsidies                   | 3 | partially | 0.167 |
|                                    |   | partially | 0.167 |
|                                    |   | partially | 0.167 |
| Air quality                        | 1 | partially | 0.500 |
| Just transition and energy poverty | 2 | partially | 0.250 |
|                                    |   | partially | 0.250 |
|                                    |   |           | 5.875 |

**Table S68. Romania LTS Scores**

| Romania – LTS                       | Value       | Score |
|-------------------------------------|-------------|-------|
| Overall goal of LTS                 | clear goal  | 0     |
| Scenarios presented in the LTS      | 0 scenarios | 0     |
| GHG reductions                      | modelling   | 0     |
| Renewable energy sources            | NA          | 0     |
| Energy Efficiency                   | NA          | 0     |
| Estimated Investment                | NA          | 0     |
| Socio-Economic impact of transition | NA          | 0     |
| Adaptation Policies measures        | limited     | 0     |
| Public Consultation                 | limited     | 0     |
| Legal status of LTS and targets     | yes         | 0     |
|                                     |             | 0     |

#### Slovakia

**Table S69. Slovakia NECPs Targets**

| Slovakia – NECPs Target      |                                                              |    |      |           |                      |      |
|------------------------------|--------------------------------------------------------------|----|------|-----------|----------------------|------|
| National Target Contribution | Latest Available Data 2020 Target 2030 Target Ambition Level |    |      |           | EU NECPs 2030 Target |      |
|                              | (Oct 2020)                                                   |    |      |           |                      |      |
| GHG                          | –5                                                           | 13 | –12  | ambitious | 7                    | –40  |
| Renewables energy            | 11.9                                                         | 14 | 19.2 | un ambit  | 4                    | 32   |
| Energy Efficiency primary    | 32.6                                                         | 43 | 32.3 | low       | 2                    | 32.5 |

|                                 |      |      |      |     |    |
|---------------------------------|------|------|------|-----|----|
| Energy Efficiency final         | 23.6 | 30.3 | 25.7 | low | 2  |
| Electric grid interconnectivity | 9.3  | 10   | 15.4 |     |    |
|                                 |      |      |      |     | 15 |

**Table S701. Slovakia NECPs Recommendations**

| <b>Slovakia – NECPs Recommendations</b> |                 |                          |              |
|-----------------------------------------|-----------------|--------------------------|--------------|
| <b>Recommendations</b>                  | <b>N of Rec</b> | <b>Policy Assessment</b> | <b>Score</b> |
| Decarbonization – GHG                   | 1               | No rec                   | 1.000        |
| Decarbonization renew                   | 6               | partially                | 0.083        |
|                                         |                 | fully                    | 0.167        |
|                                         |                 | partially                | 0.083        |
| Energy efficiency                       | 2               | partially                | 0.250        |
|                                         |                 | partially                | 0.250        |
| Energy security                         | 1               | partially                | 0.500        |
| Internal energy market                  | 1               | partially                | 0.500        |
| Research and Innovation                 | 1               | partially                | 0.500        |
| Regional cooperation                    | 1               | largely                  | 0.750        |
| Investment and funding                  | 1               | largely                  | 0.750        |
| Energy subsidies                        | 3               | largely                  | 0.250        |
|                                         |                 | largely                  | 0.250        |
|                                         |                 | NA                       | 0.000        |
| Air quality                             | 1               | NA                       | 0.000        |
| Just transition and energy poverty      | 2               | partially                | 0.250        |
|                                         |                 | NA                       | 0.000        |
|                                         |                 |                          | 5.833        |

**Table S71. Slovakia LTS Scores**

| <b>Slovakia – LTS</b>               | <b>Value</b>       | <b>Score</b> |
|-------------------------------------|--------------------|--------------|
| Overall goal of LTS                 | climate neutrality | 1            |
| Scenarios presented in the LTS      | 2 scenarios        | 1            |
| GHG reductions                      | modelling          | 1            |
| Renewable energy sources            | NA                 | 0            |
| Energy Efficiency                   | NA                 | 0            |
| Estimated Investment                | assessment         | 1            |
| Socio-Economic impact of transition | assessment         | 1            |
| Adaptation Policies measures        | yes                | 1            |
| Public Consultation                 | limited            | 0,5          |
| Legal status of LTS and targets     | unspecified        | 0            |
|                                     |                    | 6,5          |

## Slovenia

**Table S72. Slovenia NECPs Targets**

| <b>Slovenia – NECPs Target</b>      |                         |                    |                    |                       |                 |
|-------------------------------------|-------------------------|--------------------|--------------------|-----------------------|-----------------|
| <b>National Target Contribution</b> | <b>Latest Available</b> | <b>2020 Target</b> | <b>2030 Target</b> | <b>Ambition Level</b> | <b>EU NECPs</b> |

|                                 | Data (Oct 2020) |                |                |          | 2030 Target |      |
|---------------------------------|-----------------|----------------|----------------|----------|-------------|------|
| GHG                             | -7              | 4              | -15            | more amb | 7           | -40  |
| Renewables energy               | 21.1            | 25             | 27             | un ambit | 4           | 32   |
| Energy Efficiency primary       | 6.8             | 7.1            | 6.4            | modest   | 3           | 32.5 |
| Energy Efficiency final         | 5               | 5.1            | 4.7            | low      | 2           |      |
| Electric grid interconnectivity | 83.6            | no spec target | no spec target |          |             |      |
|                                 |                 |                |                |          | 16          |      |

**Table S73. Slovenia NECPs Recommendations**

| Slovenia – NECPs Recommendations   |          |                   |       |
|------------------------------------|----------|-------------------|-------|
| Recommendations                    | N of Rec | Policy Assessment | Score |
| Decarbonization – GHG              | 1        | partially         | 0.500 |
| Decarbonization renew              | 6        | partially         | 0.083 |
|                                    |          | largely           | 0.125 |
|                                    |          | partially         | 0.083 |
|                                    |          | partially         | 0.083 |
|                                    |          | partially         | 0.083 |
|                                    |          | largely           | 0.125 |
| Energy efficiency                  | 2        | partially         | 0.250 |
|                                    |          | partially         | 0.250 |
| Energy security                    | 1        | largely           | 0.750 |
| Internal energy market             | 1        | NA                | 0.000 |
| Research and Innovation            | 2        | partially         | 0.250 |
|                                    |          | partially         | 0.250 |
| Regional cooperation               | 2        | partially         | 0.250 |
|                                    |          | partially         | 0.250 |
| Investment and funding             | 1        | partially         | 0.500 |
| Energy subsidies                   | 3        | partially         | 0.167 |
|                                    |          | partially         | 0.167 |
|                                    |          | NA                | 0.000 |
| Air quality                        | 1        | NA                | 0.000 |
| Just transition and energy poverty | 2        | partially         | 0.250 |
|                                    |          | NA                | 0.000 |
|                                    |          |                   | 4.417 |

**Table S74. Slovenia LTS Scores**

| Slovenia – LTS                      |                    |     |
|-------------------------------------|--------------------|-----|
| Overall goal of LTS                 | climate neutrality | 1   |
| Scenarios presented in the LTS      | 2 scenarios        | 1   |
| GHG reductions                      | modelling          | 1   |
| Renewable energy sources            | modelling          | 1   |
| Energy Efficiency                   | modelling          | 1   |
| Estimated Investment                | assessment         | 1   |
| Socio-Economic impact of transition | NA                 | 0   |
| Adaptation Policies measures        | limited            | 0.5 |
| Public Consultation                 | limited            | 0.5 |
| Legal status of LTS and targets     | NO                 | 0   |
|                                     |                    | 7   |

Spain

Table S75. Spain NECPs Targets.

| Spain – NECPs Target            |                                  |                |                |                |                      |      |
|---------------------------------|----------------------------------|----------------|----------------|----------------|----------------------|------|
| National Target Contribution    | Latest Available Data (Oct 2020) | 2020 Target    | 2030 Target    | Ambition Level | EU NECPs 2030 Target |      |
| GHG                             | –14                              | –10            | –26            | amb as ESR     | 5                    | –40  |
| Renewables energy               | 17.4                             | 20             | 42             | suff amb       | 6                    | 32   |
| Energy Efficiency primary       | 124.59                           | 122.6          | 98.5           | suff           | 6                    | 32.5 |
| Energy Efficiency final         | 86.88                            | 87.23          | 73.6           | suff           | 6                    |      |
| Electric grid interconnectivity | 83.6                             | no spec target | no spec target |                |                      |      |
|                                 |                                  |                |                |                | 23                   |      |

Table S76. Spain NECPs Recommendations

| Spain – NECPs Recommendations      |          |                   |       |
|------------------------------------|----------|-------------------|-------|
| Recommendations                    | N of Rec | Policy Assessment | Score |
| Decarbonization – GHG              | 1        | No rec            | 1.000 |
| Decarbonization renew              | 3        | fully             | 0.333 |
|                                    |          | partially         | 0.167 |
|                                    |          | fully             | 0.333 |
| Energy efficiency                  | 1        | partially         | 0.500 |
| Energy security                    | 1        | fully             | 1.000 |
| Internal energy market             | 1        | largely           | 0.750 |
| Research and Innovation            | 1        | partially         | 0.500 |
| Regional cooperation               | 2        | largely           | 0.375 |
|                                    |          | NA                | 0.000 |
| Investment and funding             | 1        | No rec            | 1.000 |
| Energy subsidies                   | 3        | largely           | 0.250 |
|                                    |          | largely           | 0.250 |
|                                    |          | partially         | 0.167 |
| Air quality                        | 1        | No rec            | 1.000 |
| Just transition and energy poverty | 3        | partially         | 0.167 |
|                                    |          | fully             | 0.333 |
|                                    |          | fully             | 0.333 |
|                                    |          |                   | 8.458 |

Table S77. Spain LTS Scores

| Spain – LTS                         | Value              | Score |
|-------------------------------------|--------------------|-------|
| Overall goal of LTS                 | climate neutrality | 1     |
| Scenarios presented in the LTS      | 2 scenarios        | 1     |
| GHG reductions                      | modelling          | 1     |
| Renewable energy sources            | modelling          | 1     |
| Energy Efficiency                   | modelling          | 1     |
| Estimated Investment                | assessment         | 1     |
| Socio-Economic impact of transition | assessment         | 1     |

|                                 |     |    |
|---------------------------------|-----|----|
| Adaptation Policies measures    | yes | 1  |
| Public Consultation             | yes | 1  |
| Legal status of LTS and targets | yes | 1  |
|                                 |     | 10 |

## Sweden

Table S78. Sweden NECPs Targets

| Sweden – NECPs Target           |                                  |                |                |                |                      |      |
|---------------------------------|----------------------------------|----------------|----------------|----------------|----------------------|------|
| National Target Contribution    | Latest Available Data (Oct 2020) | 2020 Target    | 2030 Target    | Ambition Level | EU NECPs 2030 Target |      |
| GHG                             | -25                              | -17            | -40            | more amb       | 7                    | -40  |
| Renewables energy               | 54.6                             | 49             | 65             | suff amb       | 6                    | 32   |
| Energy Efficiency primary       | 47                               | 43.4           | 40.2           | modest         | 3                    | 32.5 |
| Energy Efficiency final         | 32                               | 30.3           | 29.7           | modest         | 3                    |      |
| Electric grid interconnectivity | 83.6                             | no spec target | no spec target |                |                      |      |
|                                 |                                  |                |                |                | 19                   |      |

Table S79. Sweden NECPs Recommendations

| Sweden – NECPs Recommendations     |          |                   |       |
|------------------------------------|----------|-------------------|-------|
| Recommendations                    | N of Rec | Policy Assessment | Score |
| Decarbonization – GHG              | 1        | partially         | 0.500 |
| Decarbonization renew              | 5        | fully             | 0.200 |
|                                    |          | partially         | 0.100 |
|                                    |          | fully             | 0.200 |
|                                    |          | partially         | 0.100 |
|                                    |          | partially         | 0.100 |
| Energy efficiency                  | 1        | partially         | 0.500 |
| Energy security                    | 1        | largely           | 0.750 |
| Internal energy market             | 1        | No rec            | 1.000 |
| Research and Innovation            | 1        | partially         | 0.500 |
| Regional cooperation               | 1        | fully             | 1.000 |
| Investment and funding             | 1        | partially         | 0.500 |
| Energy subsidies                   | 3        | largely           | 0.250 |
|                                    |          | fully             | 0.333 |
|                                    |          | NA                | 0.000 |
| Air quality                        | 1        | largely           | 0.750 |
| Just transition and energy poverty | 1        | NA                | 0.000 |
|                                    |          |                   | 6.783 |

Table S80. Sweden LTS Scores

| Sweden – LTS                   | Value              | Score |
|--------------------------------|--------------------|-------|
| Overall goal of LTS            | climate neutrality | 1     |
| Scenarios presented in the LTS | 0 scenarios        | 0     |
| GHG reductions                 | modelling          | 1     |
| Renewable energy sources       | NA                 | 0     |
| Energy Efficiency              | modelling          | 1     |
| Estimated Investment           | NA                 | 0     |

|                                     |         |     |
|-------------------------------------|---------|-----|
| Socio-Economic impact of transition | NA      | 0   |
| Adaptation Policies measures        | yes     | 1   |
| Public Consultation                 | limited | 0.5 |
| Legal status of LTS and targets     | yes     | 1   |
|                                     |         | 5.5 |
